# Supplementary material for: Expression of Vitis amurensis VaERF20 in Arabidopsis thaliana Improves Resistance to Botrytis cinerea and Pseudomonas syringae pv. Tomato DC3000
Source: MDPI journal article supplement (doi:10.3390/ijms19030696), 2018-03-01
Supplement: s1 [file s1]

**Table S1.** Primers used for expression analysis of *Arabidopsis thaliana* resistance-related genes.

| Gene            | Gene locus TAG    | Forward primer(5'to 3') | Reverse primer (5'to 3')  |
|-----------------|-------------------|-------------------------|---------------------------|
| <i>AtPR1</i>    | AT2G14610         | AAC TACGCTGCGAACACGTG   | TCAC TTTGGCACATCCGAGT     |
| <i>AtPDF1.2</i> | AT5G44420         | GAAGCACAGAAGTTGTGCGA    | TGTAACAACAACGGGAAAATAAACA |
| <i>AtORA59</i>  | AT1G06160         | TTGTTATGACGCAAGAAAG     | CCAACAGTAACGCAAATAG       |
| <i>AtWRKY53</i> | AT4G23810         | GCGACAAGACACCAGAGTCAA   | CGCCGTTGATAGTTCCGTAA      |
| <i>AtFRK1</i>   | AT2G19190         | GCCAACGGAGACATTAGAG     | CCATAACGACCTGACTCAT       |
| <i>AtLOX3</i>   | AT2G35980         | TCTCCGTACAACAAGCGTTGG   | GCGTCCGTCTAGCGCATTAA      |
| <i>AtActin</i>  | AT2G37620         | GGTAACATTGTGCTCAGTGGTGG | AACGACCTTAATCTTCATGCTGC   |
| <i>VaERF20</i>  | GSVIVT01028314001 | CGGAGATACGAGACCCTTCAA   | GAGAAAGTCTGCCCATACCCT     |
